# Supplementary material for: Cucumber (Cucumis sativus L.) Leaf Extract as a Green Corrosion Inhibitor for Carbon Steel in Acidic Solution: Electrochemical, Functional and Molecular Analysis
Source: MDPI journal article supplement (doi:10.3390/molecules27123826), 2022-06-14
Supplement: s1 [file s1]

# Cucumber (*Cucumis Sativus* L.) Leaf Extract as a Green Corrosion Inhibitor for Carbon Steel in Acidic Solution: Electrochemical, Functional and Molecular Analysis

Lijuan Feng <sup>1,\*</sup>, Shanshan Zhang <sup>1</sup>, Long Hao <sup>2</sup>, HongChen Du <sup>1</sup>, Rongkai Pan <sup>1</sup>,  
Guofu Huang <sup>1</sup> and Haijian Liu <sup>1</sup>

<sup>1</sup> Shandong Engineering Research Center of Green and High-Value Marine Fine Chemical, Weifang University of Science and Technology, Weifang, Shandong 262700, China; lgylgy@wfust.edu.cn

<sup>2</sup> CAS Key Laboratory of Nuclear Materials and Safety Assessment, Institute of Metal Research, Chinese Academy of Sciences, Shenyang, Liaoning 110016, China; chinahaolong@126.com

\* Correspondence: ljfeng@alum.imr.ac.cn; Tel.: +86-0536-5107-638

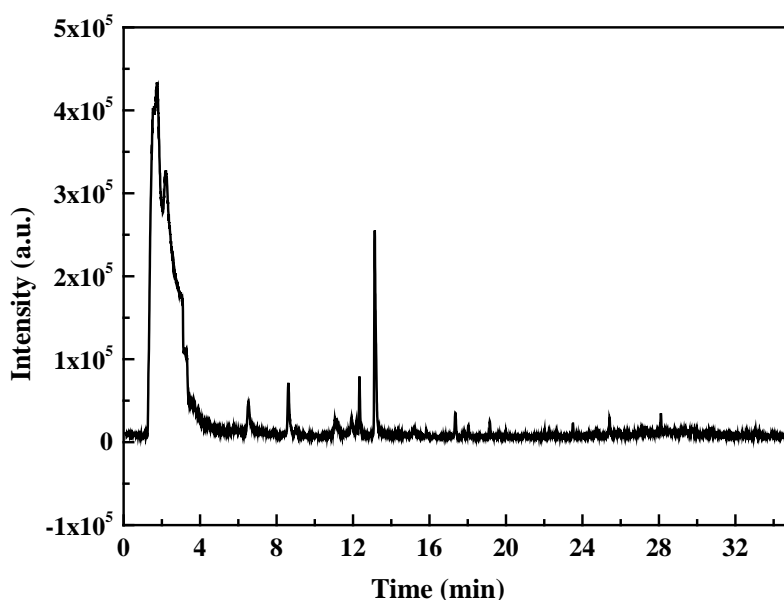

Figure S1. GC-MS chromatogram of ECSL.
